# Supplementary material for: Main-chain polyoxometalate-containing donor–acceptor conjugated copolymers: synthesis, characterization, morphological studies and applications in single-component photovoltaic cells
Source: Royal Society of Chemistry journal article supplement (doi:10.1039/c6ra03251f), 2016-01-01
Supplement: c6ra03251f1.pdf [file c6ra03251f1.pdf]

Electronic Supplementary Information (ESI) for *RSC Advances*

This journal is © the Royal Society of Chemistry 2016

## Electronic Supplementary Information (ESI)

# **Main-chain polyoxometalate-containing donor-acceptor conjugated copolymers: synthesis, characterization, morphological studies and applications in single-component photovoltaic cells**

Yong Li, Kuldeep Shetye, Khagendra Baral, Lu Jin, John D. Oster, Da-Ming Zhu, Zhonghua Peng\*

[pengz@umkc.edu](mailto:pengz@umkc.edu)

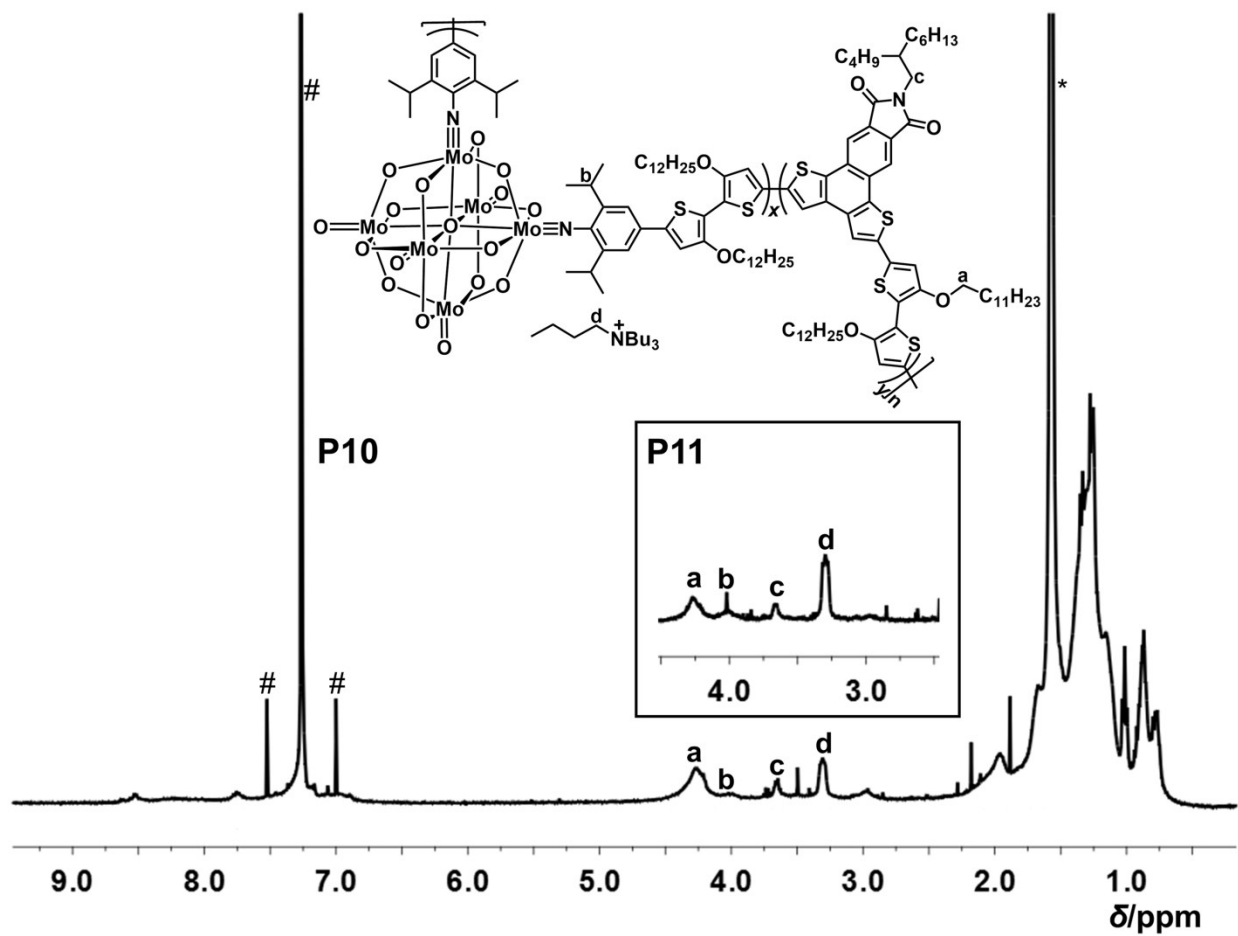

**Fig. S1** <sup>1</sup>H NMR spectrum of **P10** in CDCl<sub>3</sub> (signals labeled with “#” or “\*” are solvent peaks).

The inset in rectangle displays the region of interest of the <sup>1</sup>H NMR spectrum of **P11** in CDCl<sub>3</sub>.

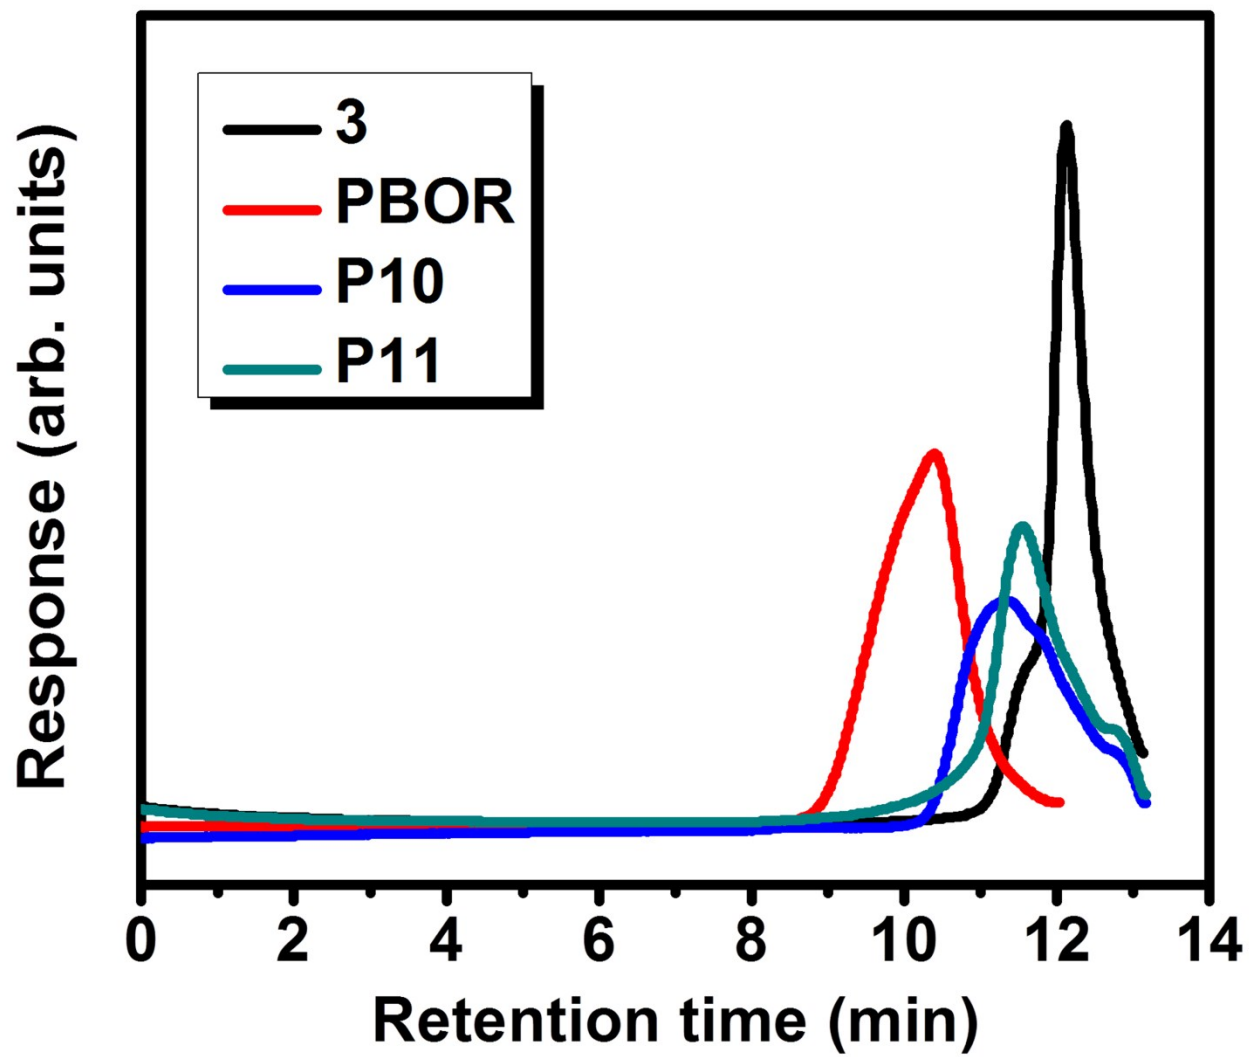

Fig. S2 GPC traces of monomer 3, PBOR, P10, and P11 using THF as the eluent.

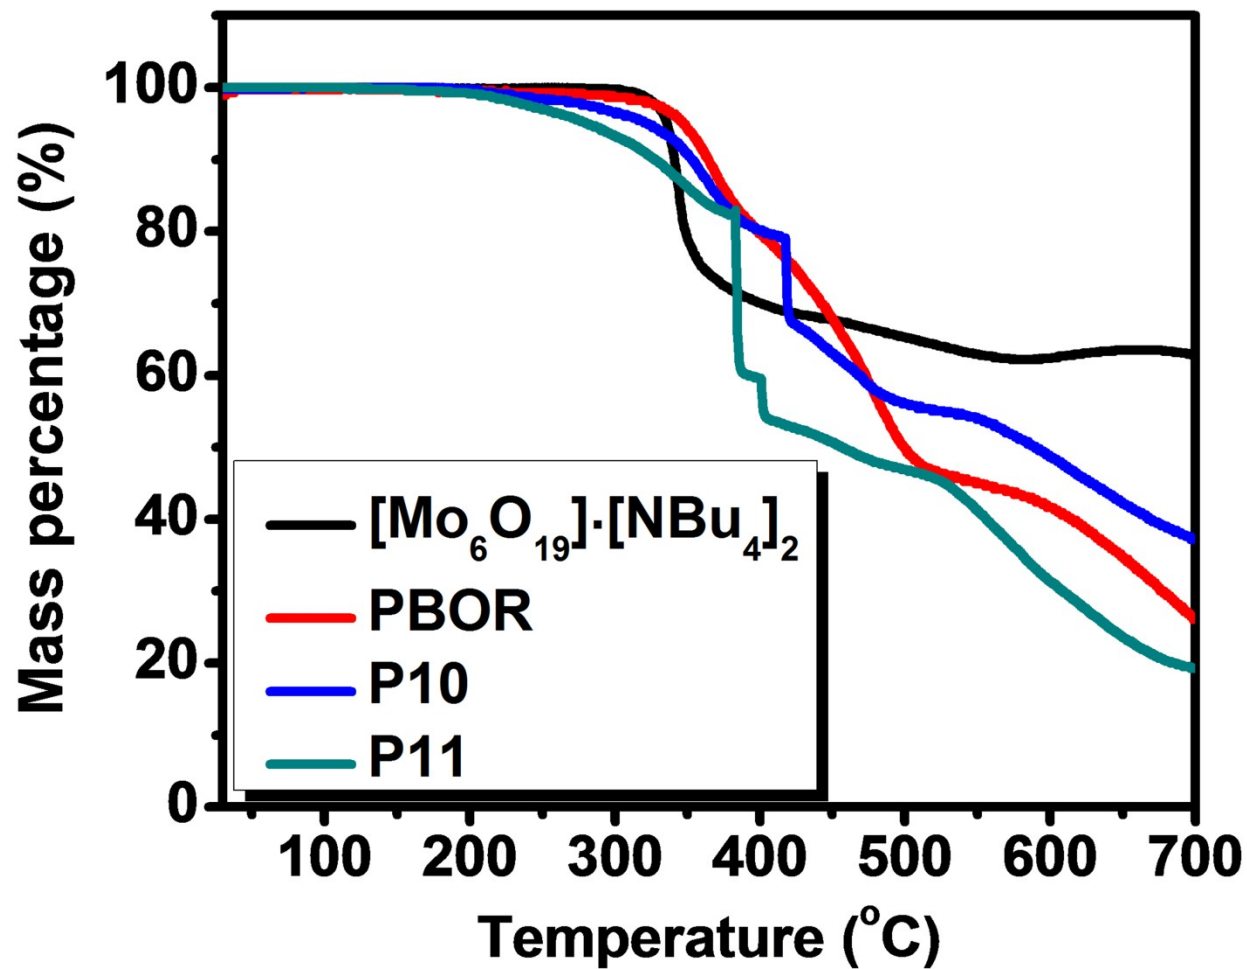

Fig. S3 TGA thermograms of  $[\text{Mo}_6\text{O}_{19}] \cdot [\text{NBu}_4]_2$  cluster, PBOR, P10 and P11.

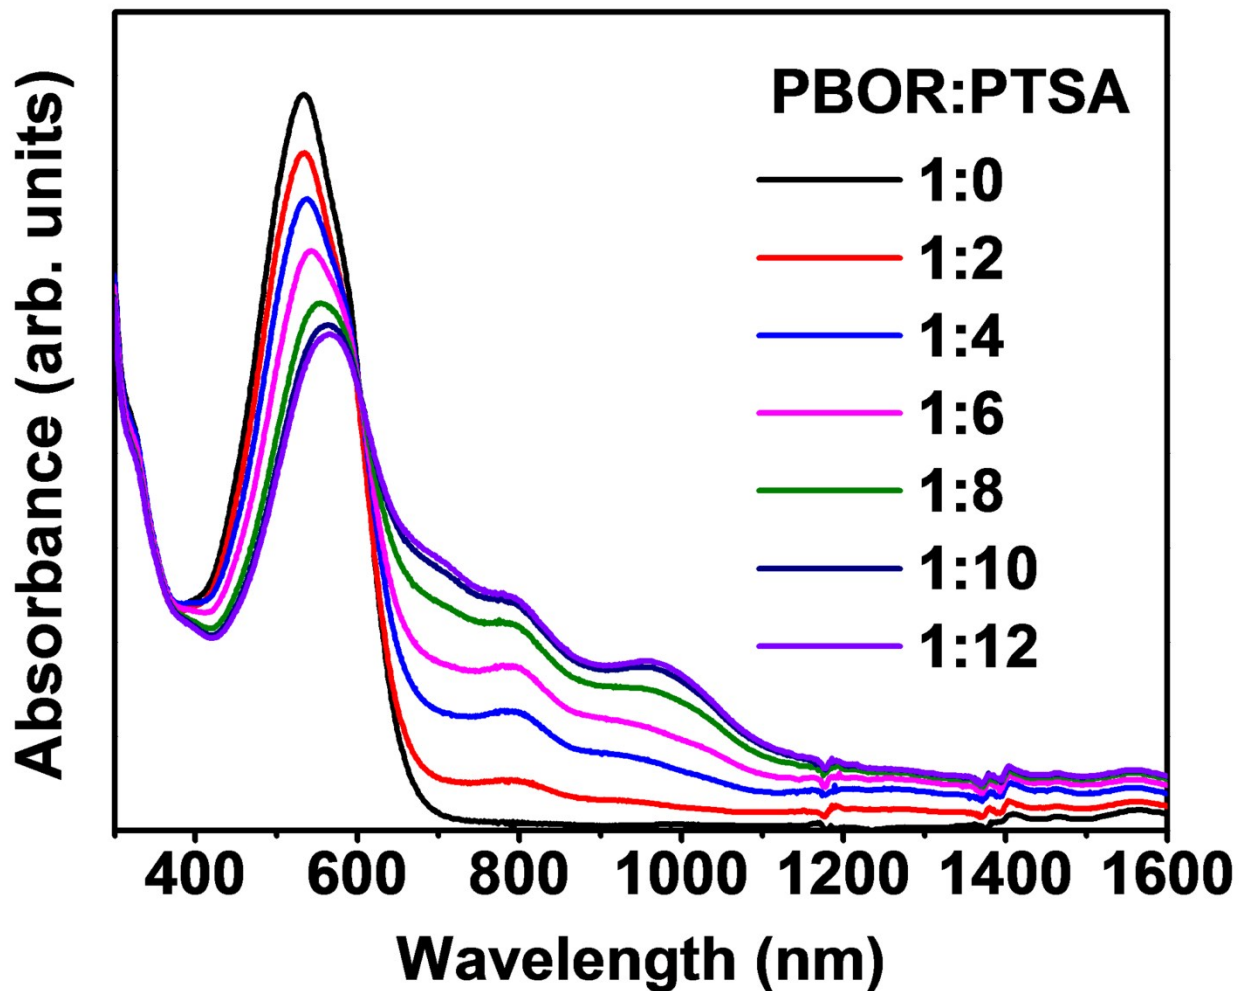

Fig. S4 Absorption spectra of dilute THF solutions of polymer **PBOR**:*p*-toluenesulfonic acid (PTSA) mixture in different molar ratios. The concentration of **PBOR** was kept as constant during measurements.
